# Supplementary material for: Identification and Characterization of ATP-Binding Cassette Transporters in Chlamydomonas reinhardtii
Source: MDPI journal article supplement (doi:10.3390/md20100603), 2022-09-25

## Prediction of transmembrane helices in proteins

### ABCA Subfamily

| Half-size Transporter                                                                                                                            | Full-size Transporter                                                                                                                            |
|--------------------------------------------------------------------------------------------------------------------------------------------------|--------------------------------------------------------------------------------------------------------------------------------------------------|
| 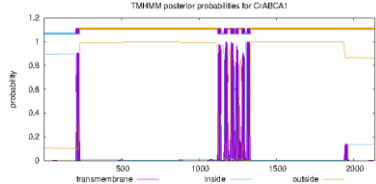 <p>CrABCA1: Number of predicted transmembrane helices: 7</p>   |  <p>CrABCA2: Number of predicted transmembrane helices: 11</p> |
|  <p>CrABCA4_1: Number of predicted transmembrane helices: 6</p> |  <p>CrABCA3: Number of predicted transmembrane helices: 14</p> |
|  <p>CrABCA4_2: Number of predicted transmembrane helices: 6</p> |                                                                                                                                                  |
|  <p>CrABCA5: Number of predicted transmembrane helices: 7</p> |                                                                                                                                                  |
|  <p>CrABCA6: Number of predicted transmembrane helices: 5</p> |                                                                                                                                                  |
|  <p>CrABCA7: Number of predicted transmembrane helices: 7</p> |                                                                                                                                                  |

## ABCB Subfamily

| Half-size Transporter                                                                                                       | Full-size Transporter                                                                                          |
|-----------------------------------------------------------------------------------------------------------------------------|----------------------------------------------------------------------------------------------------------------|
| <p>TMHMM posterior probabilities for CrABCB1<sub>1</sub></p> <p>CrABCB1_1: Number of predicted transmembrane helices: 9</p> | <p>TMHMM posterior probabilities for CrABCB6</p> <p>CrABCB6: Number of predicted transmembrane helices: 11</p> |
| <p>TMHMM posterior probabilities for CrABCB1<sub>2</sub></p> <p>CrABCB1_2: Number of predicted transmembrane helices: 9</p> | <p>TMHMM posterior probabilities for CrABCB7</p> <p>CrABCB7: Number of predicted transmembrane helices: 11</p> |
| <p>TMHMM posterior probabilities for CrABCB2</p> <p>CrABCB2: Number of predicted transmembrane helices: 6</p>               |                                                                                                                |
| <p>TMHMM posterior probabilities for CrABCB3</p> <p>CrABCB3: Number of predicted transmembrane helices: 11</p>              |                                                                                                                |
| <p>TMHMM posterior probabilities for CrABCB4</p> <p>CrABCB4: Number of predicted transmembrane helices: 7</p>               |                                                                                                                |
| <p>TMHMM posterior probabilities for CrABCB5</p> <p>CrABCB5: Number of predicted transmembrane helices: 5</p>               |                                                                                                                |
| <p>TMHMM posterior probabilities for CrABCB8</p> <p>CrABCB8: Number of predicted transmembrane helices: 5</p>               |                                                                                                                |

## ABCC Subfamily

| Half-size Transporter                                                                                                                          | Full-size Transporter                                                                                                                               |
|------------------------------------------------------------------------------------------------------------------------------------------------|-----------------------------------------------------------------------------------------------------------------------------------------------------|
| 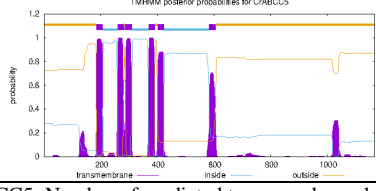 <p>CrABCC5: Number of predicted transmembrane helices: 6</p> |  <p>CrABCC1: Number of predicted transmembrane helices: 13</p>    |
|                                                                                                                                                |  <p>CrABCC2: Number of predicted transmembrane helices: 9</p>     |
|                                                                                                                                                |  <p>CrABCC3: Number of predicted transmembrane helices: 11</p>    |
|                                                                                                                                                |  <p>CrABCC4: Number of predicted transmembrane helices: 6</p>    |
|                                                                                                                                                |  <p>CrABCC6_1: Number of predicted transmembrane helices: 5</p> |
|                                                                                                                                                |  <p>CrABCC6_2: Number of predicted transmembrane helices: 5</p> |
|                                                                                                                                                |  <p>CrABCC7: Number of predicted transmembrane helices: 7</p>   |

|  |                                                                                                                                                                                                                                   |
|--|-----------------------------------------------------------------------------------------------------------------------------------------------------------------------------------------------------------------------------------|
|  | 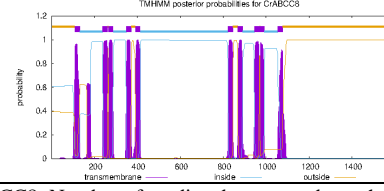 <p>TMHMM posterior probabilities for CrABCC8</p> <p>probability</p> <p>transmembrane inside outside</p> <p>200 400 600 800 1000 1200 1400</p>  |
|  | CrABCC8: Number of predicted transmembrane helices: 10                                                                                                                                                                            |
|  |  <p>TMHMM posterior probabilities for CrABCC9</p> <p>probability</p> <p>transmembrane inside outside</p> <p>500 1000 1500 2000 2500</p>         |
|  | CrABCC9: Number of predicted transmembrane helices: 8                                                                                                                                                                             |
|  |  <p>TMHMM posterior probabilities for CrABCC10</p> <p>probability</p> <p>transmembrane inside outside</p> <p>200 400 600 800 1000 1200 1400</p> |
|  | CrABCC10: Number of predicted transmembrane helices: 11                                                                                                                                                                           |

## ABCD Subfamily

| Half-size Transporter                                        | Full-size Transporter |
|--------------------------------------------------------------|-----------------------|
| <p>TMHMM posterior probabilities for CrABCD1</p>             |                       |
| CrABCD1: Number of predicted transmembrane helices: 3        |                       |
| <p>TMHMM posterior probabilities for CrABCD2</p>             |                       |
| CrABCD2: Number of predicted transmembrane helices: 3        |                       |
| <p>TMHMM posterior probabilities for CrABCD3<sub>2</sub></p> |                       |
| CrABCD3_2: Number of predicted transmembrane helices: 0      |                       |
| <p>TMHMM posterior probabilities for CrABCD3<sub>1</sub></p> |                       |
| CrABCD3_1: Number of predicted transmembrane helices: 0      |                       |
| <p>TMHMM posterior probabilities for CrABCD3<sub>3</sub></p> |                       |
| CrABCD3_3: Number of predicted transmembrane helices: 0      |                       |

## ABCE/F Subfamily

|                                                       |                                                       |
|-------------------------------------------------------|-------------------------------------------------------|
| <p>TMHMM posterior probabilities for CrABCE</p>       | <p>TMHMM posterior probabilities for CrABCF1</p>      |
| CrABCE: Number of predicted transmembrane helices: 0  | CrABCF1: Number of predicted transmembrane helices: 0 |
| <p>TMHMM posterior probabilities for CrABCF2</p>      | <p>TMHMM posterior probabilities for CrABCF3</p>      |
| CrABCF2: Number of predicted transmembrane helices: 0 | CrABCF3: Number of predicted transmembrane helices: 0 |

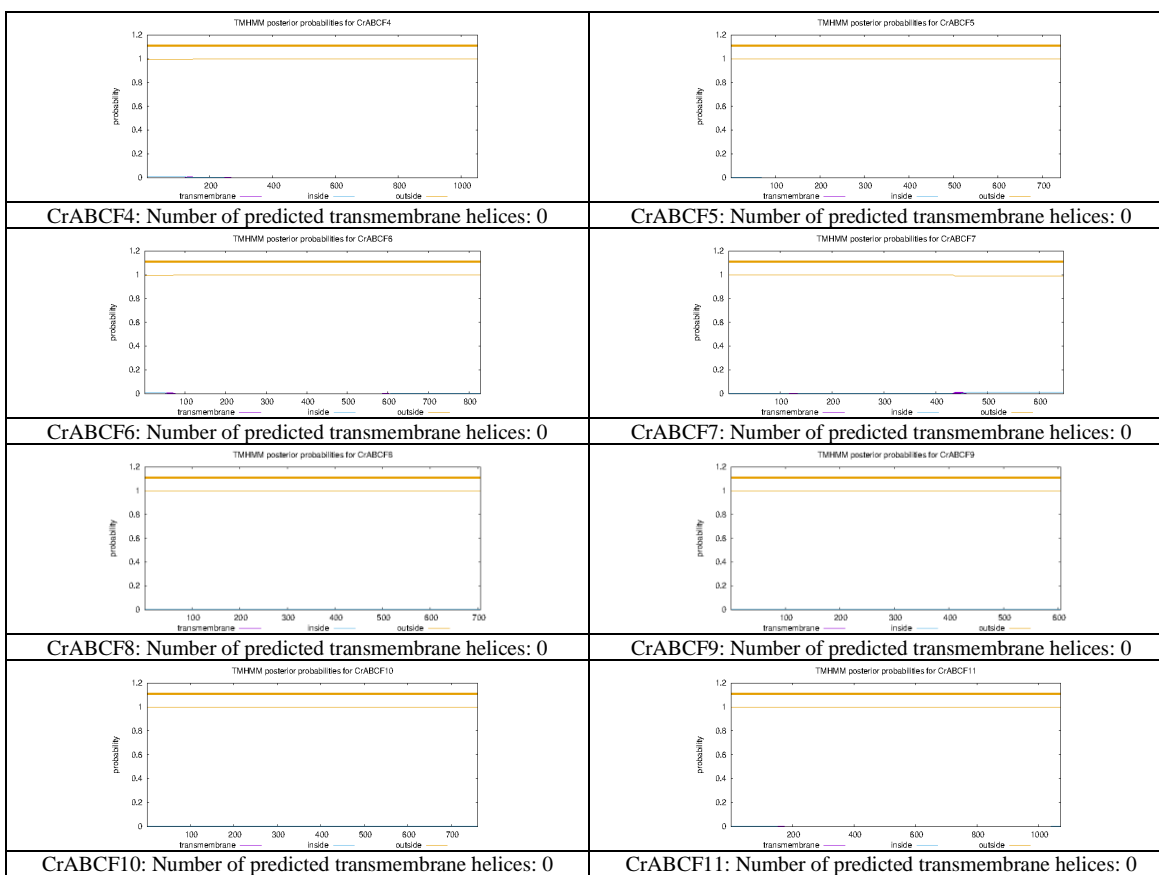

### ABCG Subfamily

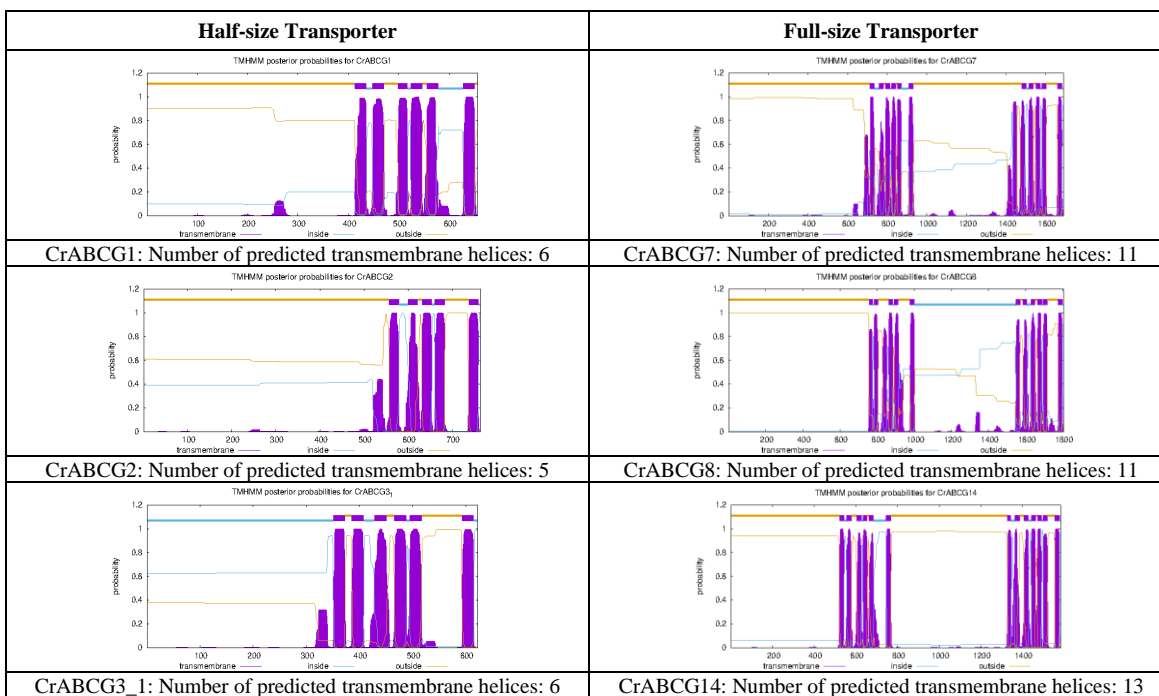

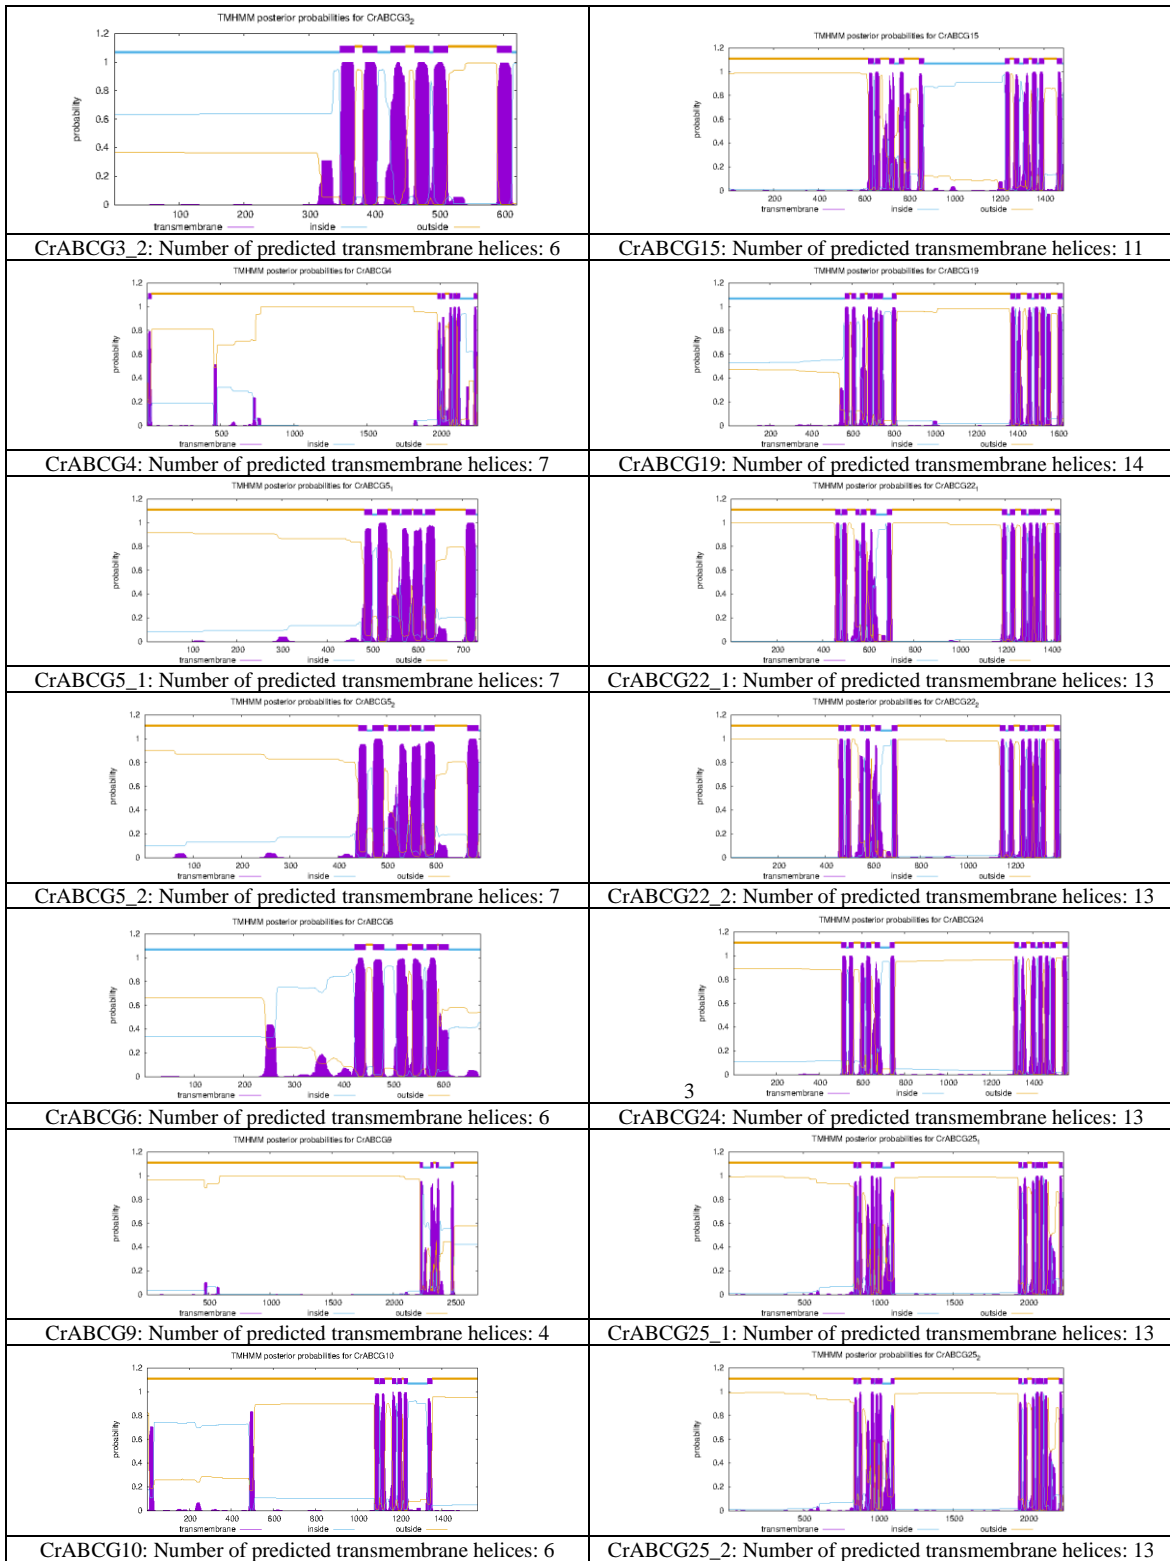

|                                                                                     |  |
|-------------------------------------------------------------------------------------|--|
| 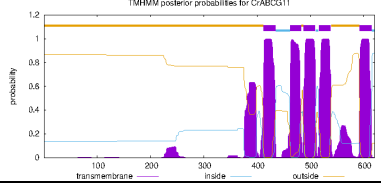   |  |
| <p>CrABCG11: Number of predicted transmembrane helices: 5</p>                       |  |
|    |  |
| <p>CrABCG12: Number of predicted transmembrane helices: 5</p>                       |  |
|    |  |
| <p>CrABCG13_1: Number of predicted transmembrane helices: 6</p>                     |  |
|   |  |
| <p>CrABCG13_2: Number of predicted transmembrane helices: 6</p>                     |  |
|  |  |
| <p>CrABCG16_1: Number of predicted transmembrane helices: 10</p>                    |  |
|  |  |
| <p>CrABCG16_2: Number of predicted transmembrane helices: 10</p>                    |  |
|  |  |
| <p>CrABCG17: Number of predicted transmembrane helices: 6</p>                       |  |
|  |  |



|                                                          |  |
|----------------------------------------------------------|--|
| CrABCG18: Number of predicted transmembrane helices: 3   |  |
|                                                          |  |
| CrABCG20: Number of predicted transmembrane helices: 12  |  |
|                                                          |  |
| CrABCG21_1: Number of predicted transmembrane helices: 7 |  |
|                                                          |  |
| CrABCG21_2: Number of predicted transmembrane helices: 7 |  |
|                                                          |  |
| CrABCG23: Number of predicted transmembrane helices: 7   |  |
|                                                          |  |
| CrABCG26: Number of predicted transmembrane helices: 7   |  |
|                                                          |  |

### ABCI Subfamily

|                                                       |                                                       |
|-------------------------------------------------------|-------------------------------------------------------|
|                                                       |                                                       |
| CrABCI1: Number of predicted transmembrane helices: 0 | CrABCI2: Number of predicted transmembrane helices: 0 |
|                                                       |                                                       |
| CrABCI3: Number of predicted transmembrane helices: 0 | CrABCI4: Number of predicted transmembrane helices: 0 |

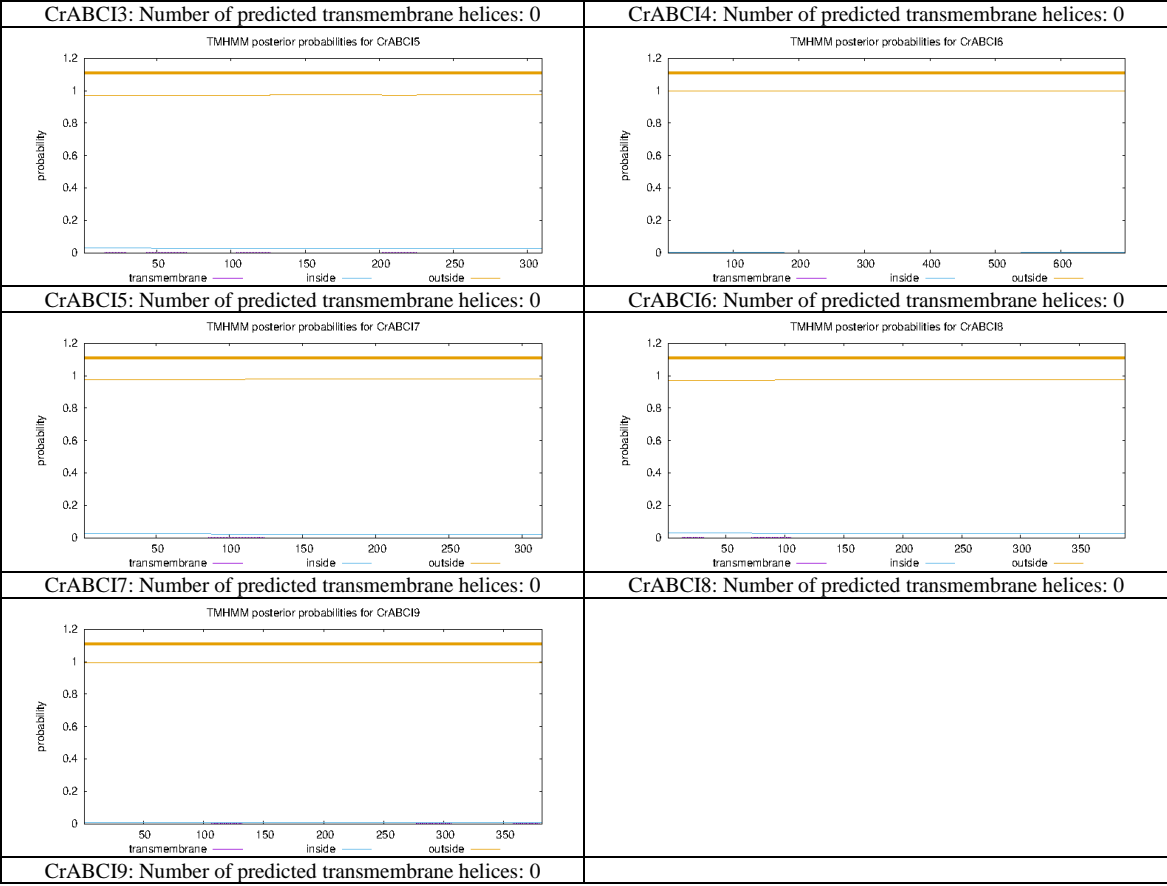

Supplement: s1 [file s1]
